1 **Influence of Mpv17 on hair-cell mitochondrial homeostasis, synapse integrity,**  
2 **and vulnerability to damage in the zebrafish lateral line**

3 **Melanie Holmgren<sup>1</sup> and Lavinia Sheets<sup>1,2\*</sup>**

4 <sup>1</sup> Department of Otolaryngology, Washington University School of Medicine, St. Louis, MO, USA

5 <sup>2</sup> Department of Developmental Biology, Washington University School of Medicine, St. Louis,  
6 MO, USA

7  
8 **\* Correspondence:**

9 Lavinia Sheets

10 [sheetsl@wustl.edu](mailto:sheetsl@wustl.edu)

11

12 **Keywords:** Mpv17, Mitochondrial Homeostasis, Hair Cell, Neuromast, Damage

13

14 **Abstract**

15 Noise exposure is particularly stressful to hair-cell mitochondria, which must produce  
16 enough energy to meet high metabolic demands as well as regulate local intracellular Ca<sup>2+</sup>  
17 concentrations. Mitochondrial Inner Membrane Protein 17 (Mpv17) functions as a non-selective  
18 channel and plays a role in maintaining mitochondrial homeostasis. In zebrafish, hair cells in  
19 *mpv17<sup>a9/a9</sup>* mutants displayed elevated levels of reactive oxygen species (ROS), elevated  
20 mitochondrial calcium, hyperpolarized transmembrane potential, and greater vulnerability to  
21 neomycin, indicating impaired mitochondrial function. Using a strong water current to  
22 overstimulate hair cells in the zebrafish lateral line, we observed *mpv17<sup>a9/a9</sup>* mutant hair cells  
23 were more vulnerable to morphological disruption and hair-cell loss than wild type siblings  
24 simultaneously exposed to the same stimulus. To determine the role of mitochondrial  
25 homeostasis on hair-cell synapse integrity, we surveyed synapse number in *mpv17<sup>a9/a9</sup>* mutants  
26 and wild type siblings as well as the sizes of presynaptic dense bodies (ribbons) and  
27 postsynaptic densities immediately following stimulus exposure. We observed mechanically  
28 injured *mpv17<sup>a9/a9</sup>* neuromasts, while they lost a greater number of hair cells, lost a similar  
29 number of synapses per hair cell relative to wild type. Additionally, we quantified the size of hair  
30 cell pre- and postsynaptic structures and observed significantly enlarged wild type postsynaptic  
31 densities, yet relatively little change in the size of *mpv17<sup>a9/a9</sup>* postsynaptic densities following  
32 stimulation. These results suggest impaired hair-cell mitochondrial activity influences synaptic  
33 morphology and hair-cell survival but does not exacerbate synapse loss following mechanical  
34 injury.

35

## Mpv17's role in hair-cell homeostasis and damage

### 36 Introduction

37 Hair cells, the sensory receptors of the inner ear, rely on mitochondria to generate  
38 energy to meet the high metabolic demands of mechanotransduction and synaptic transmission  
39 (Puschner & Schacht, 1997). Hair-cell mitochondria also produce reactive oxygen species  
40 (ROS) and contribute to the homeostatic control of intracellular  $\text{Ca}^{2+}$  (Collins et al., 2012; Matlib  
41 et al., 1998; Wong et al., 2019; Zenisek & Matthews, 2000). Disruption of mitochondrial  
42 dynamics can affect hair-cell vulnerability to damage from ototoxic drugs, as well as interfere  
43 with maintenance of hair-cell synapses (Esterberg, Hailey, Rubel, & Raible, 2014; Esterberg et  
44 al., 2016; Wong et al., 2019).

45 Zebrafish have emerged as a powerful tool to study the roles of mitochondria in hair-cell  
46 damage (Holmgren & Sheets, 2020). In addition to their ears, zebrafish have hair cells in their  
47 lateral line organs. Composed of clusters of innervated hair cells and supporting cells called  
48 neuromasts, zebrafish use their lateral line organs to detect local water currents and mediate  
49 behaviors such as escape responses and rheotaxis (Dijkgraaf, 1963; Olive et al., 2016;  
50 Olszewski, Haehnel, Taguchi, & Liao, 2012; Stewart, Cardenas, & McHenry, 2013; Suli,  
51 Watson, Rubel, & Raible, 2012). Unlike cochlear hair cells, lateral-line hair cells are superficially  
52 located on the surface of the body and are therefore pharmacologically and optically accessible  
53 in an intact fish. Zebrafish became established as a model system for studying hair-cell  
54 development and function due to identification of numerous conserved genes involved in  
55 hearing and balance (Nicolson, 2017).

56 Hearing loss is common in patients with mitochondrial disorders (Hsu et al., 2005). One  
57 gene that has been associated with mitochondrial disease in mammals and is conserved in  
58 zebrafish is *mpv17* (Krauss et al., 2013; Muller et al., 1997). *mpv17* encodes Mitochondrial Inner  
59 Membrane Protein 17, which is a non-selective cation channel that modulates the mitochondrial  
60 potential and contributes to mitochondrial homeostasis (Antonenkov et al., 2015; Jacinto et al.,  
61 2021). Mice lacking Mpv17 show severe defects in the kidney and inner ear (Meyer zum  
62 Gottesberge, Felix, Reuter, & Weiher, 2001; Meyer zum Gottesberge, Massing, & Hansen,  
63 2012; Muller et al., 1997). In contrast, zebrafish lacking Mpv17 appear healthy and have normal  
64 life spans. Two zebrafish lines containing a spontaneous mutation in *mpv17* (*roy orbison*  
65 (*mpv17<sup>a9/a9</sup>*) and *transparent* (*mpv17<sup>b18/b18</sup>*)) both contain the same 19 bp deletion leading to  
66 aberrant splicing and a premature stop codon (D'Agati et al., 2017; Krauss et al., 2013).  
67 Notably, the *mpv17<sup>a9/a9</sup>* mutation is carried in the Casper strain of zebrafish, which are  
68 commonly used for imaging studies because they lack iridophores and thus have transparent

## Mpv17's role in hair-cell homeostasis and damage

69 skin (Martorano et al., 2019; White et al., 2008). Mpv17 has been shown in zebrafish to localize  
70 to mitochondria in multiple cell types, including lateral-line hair cells (Krauss et al., 2013).  
71 Although Casper fish are commonly used in research, how loss of Mpv17 affects mitochondrial  
72 function in hair cells of the zebrafish lateral line has not yet been characterized. Additionally, as  
73 mitochondrial dysfunction is known to contribute to the pathologies underlying noise-induced  
74 hearing loss (Bottger & Schacht, 2013), we further wanted to examine the role of mitochondria  
75 homeostasis in mechanically induced hair-cell damage.

76 In this study, we investigated how loss of Mpv17 affects mitochondrial function in  
77 zebrafish lateral line hair cells as well as vulnerability to mechanical injury. In *mpv17<sup>a9/a9</sup>* hair  
78 cells, we observed elevated ROS and mitochondrial  $\text{Ca}^{2+}$ , reduced FM1-43 uptake, and  
79 increased sensitivity to neomycin-induced hair-cell death. We have previously reported a  
80 protocol using a strong water current stimulus to induce mechanical damage to zebrafish lateral-  
81 line organs (Holmgren et al., 2021). When exposed to the same stimulus as wild type siblings,  
82 mechanically overstimulated *mpv17<sup>a9/a9</sup>* neuromasts were more vulnerable to morphological  
83 disruption and hair-cell loss but showed similar degrees of de-innervation and synapse loss. Our  
84 results suggest that genetic disruption of mitochondrial homeostasis influences vulnerability to  
85 ototoxic or mechanically induced hair-cell death but does not exacerbate mechanically induced  
86 hair-cell synapse loss.

## 87 Results

### 88 Mitochondrial homeostasis is disrupted in *mpv17<sup>a9/a9</sup>* hair cells

89 It has been previously reported that zebrafish lacking Mpv17 have impaired  
90 mitochondrial function and that Mpv17 protein localizes to hair-cell mitochondria (Krauss et al.,  
91 2013; Martorano et al., 2019). We thus characterized how loss of Mpv17 affected mitochondrial  
92 homeostasis in hair cells of the lateral line. To quantify ROS levels in lateral-line hair cells, we  
93 exposed *mpv17<sup>a9/a9</sup>* larvae and their wild type siblings to the probe CellROX Green (Fig. 1 A,B).  
94 We observed increased fluorescence in *mpv17<sup>a9/a9</sup>* neuromasts relative to wild type, indicating  
95 elevated ROS in *mpv17<sup>a9/a9</sup>* hair cells (Fig. 1 C; Mann-Whitney test \*\*\*\*  $P < 0.0001$ ). We then  
96 quantified baseline mitochondrial  $\text{Ca}^{2+}$  levels using the genetically encoded indicator  
97 mitoGCaMP3 (Fig. 1 D,E) (Esterberg et al., 2014). Relative to wild type siblings, *mpv17<sup>a9/a9</sup>*  
98 neuromasts had increased mitoGCaMP3 fluorescence, indicative of elevated mitochondrial  $\text{Ca}^{2+}$   
99 (Fig. 1 F; Mann-Whitney test \*\*\*\*  $P < 0.0001$ ).

## Mpv17's role in hair-cell homeostasis and damage

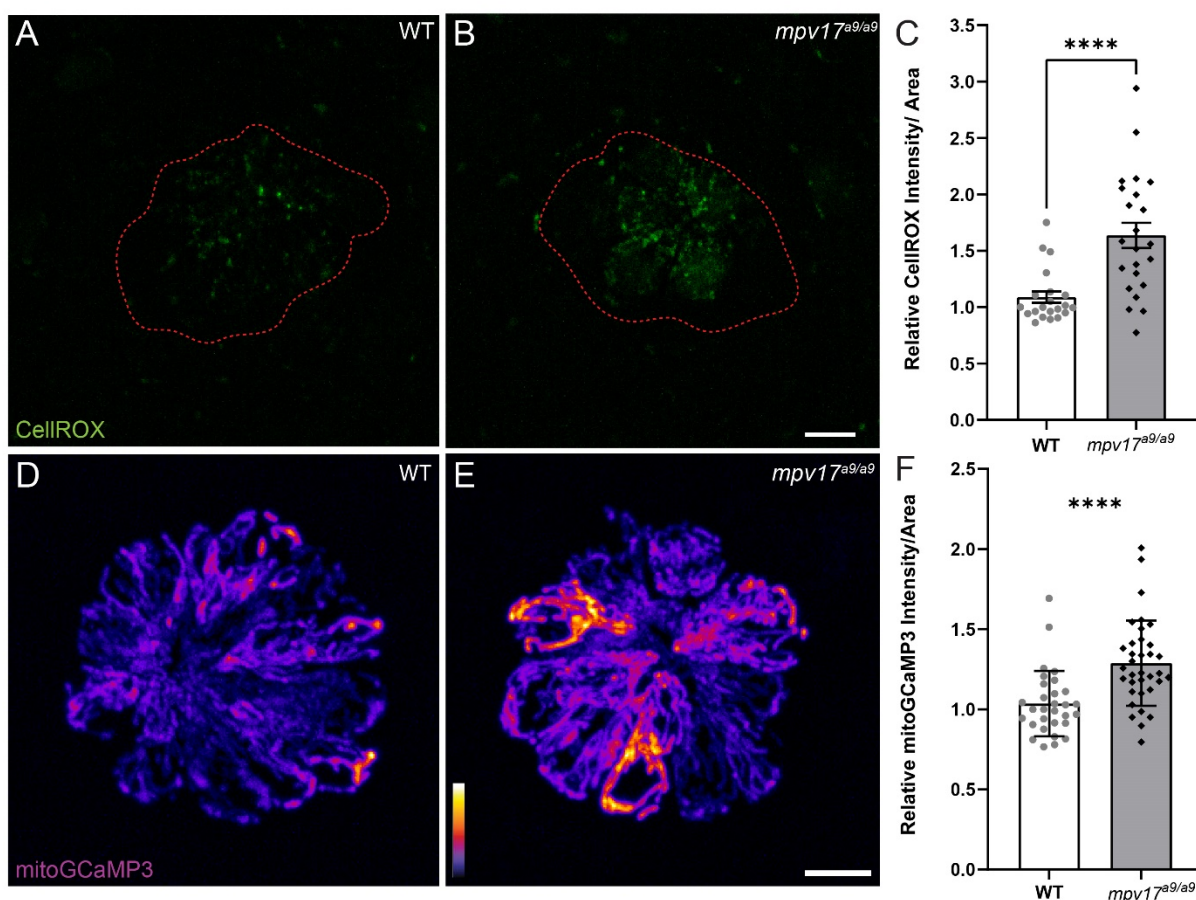

**Figure 1. Mitochondrial homeostasis in wild type and *mpv17<sup>a9/a9</sup>* neuromasts**

(A-B) Maximum-intensity projections of confocal images showing CellROX Green staining in wild type siblings (WT) (A) and *mpv17<sup>a9/a9</sup>* (B) neuromasts. Neuromast boundaries were delineated based on DIC images (not shown). (C) Mean CellROX intensity is elevated in *mpv17<sup>a9/a9</sup>* neuromasts (\*\*\*\*P<0.0001). (D-E) Maximum-intensity projections of confocal images showing mitoGCaMP3 fluorescence in WT (D) and *mpv17<sup>a9/a9</sup>* (E) neuromasts. (F) Mean mitoGCaMP3 intensity is increased in *mpv17<sup>a9/a9</sup>* neuromasts (\*\*\*\*P<0.0001). Scale bars: 5 μm.

100 It has been shown in murine fibroblasts that loss of Mpv17 results in hyperpolarized  
101 mitochondria (Antonenkov et al., 2015). To measure mitochondrial membrane potential ( $\Delta\Psi_m$ ) of  
102 lateral-line hair cells, we exposed *mpv17<sup>a9/a9</sup>* and sibling larvae to the dyes MitoTracker Red  
103 CMXRos and MitoTracker Deep Red (Fig. 2 B,C,F,G). Both of these dyes are well-retained after  
104 fixation and their accumulation in mitochondria is dependent on  $\Delta\Psi_m$  (Mot, Liddell, White, &  
105 Crouch, 2016; Pendergrass, Wolf, & Poot, 2004). We verified that these probes could be used  
106 to detect hyperpolarized  $\Delta\Psi_m$  by treating wild type larvae with cyclosporin A (Supplemental Fig.  
107 1 A,B). We also verified that MitoTracker entry into hair cells is not dependent on hair-cell  
108 mechanotransduction by briefly treating larvae with BAPTA to disrupt tip links prior to  
109 MitoTracker exposure (Supplemental Fig. 1 A,B). With both probes, we observed increased  
110 fluorescence in *mpv17<sup>a9/a9</sup>* neuromasts relative to wild type, indicating *mpv17<sup>a9/a9</sup>* hair cells have

## Mpv17's role in hair-cell homeostasis and damage

111 hyperpolarized mitochondria (Fig. 2 D, H; \*P=0.0469 MitoTracker Red CMXRos; \*\*\*\*P<0.0001  
112 MitoTracker Deep Red).

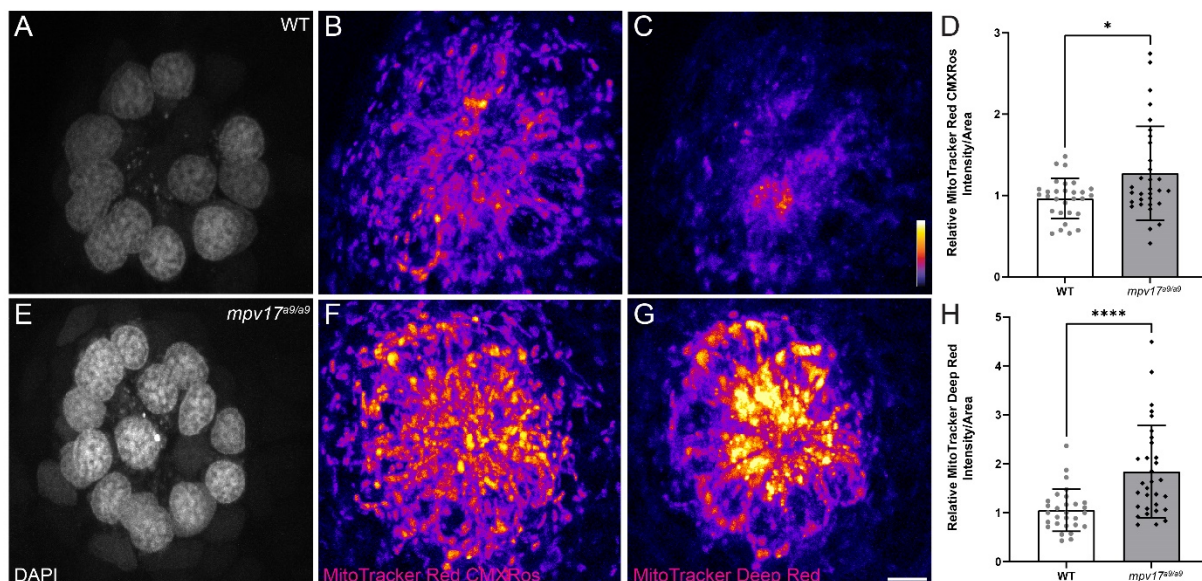

**Figure 2. *mpv17*<sup>a9/a9</sup> hair cells have hyperpolarized mitochondria**

(A-C, E-G) Maximum-intensity projections of confocal images displaying wild type (A-C) and *mpv17*<sup>a9/a9</sup> (E-G) neuromasts with DAPI-labeled hair cells (A,E) and staining with MitoTracker Red CMXRos (B,F) and MitoTracker Deep Red (C,G). (D, H) Mean intensities for both MitoTracker Red CMXRos (D) and MitoTracker Deep Red (H) are elevated in *mpv17*<sup>a9/a9</sup> neuromasts (\*P=0.0469; \*\*\*\*P<0.0001). Scale bar: 5  $\mu$ m.

113 To determine the effect of Mpv17 deficiency on hair-cell function, we next exposed  
114 *mpv17*<sup>a9/a9</sup> and wild type larvae to the vital dye FM1-43FX (Fig. 3 A,B). Labeling of hair cells  
115 following brief exposure to FM1-43 occurs via active mechanotransduction, and reduced  
116 labeling indicates reduced driving force for cations through mechanotransduction channels

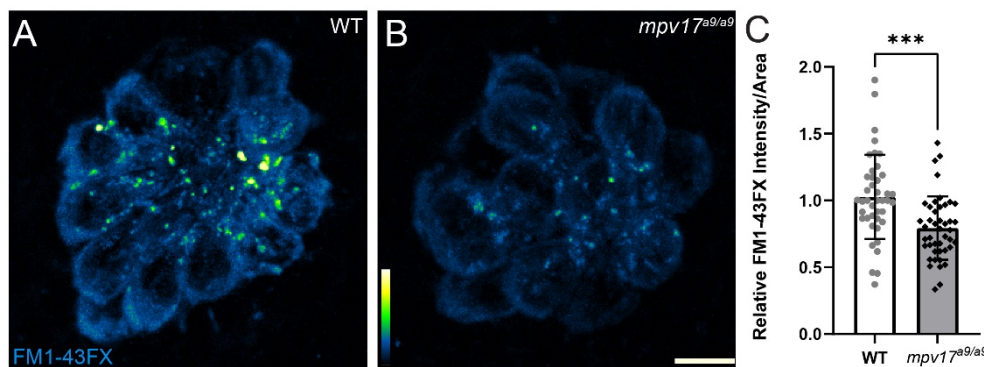

**Figure 3. FM1-43 uptake is reduced in *mpv17*<sup>a9/a9</sup> hair cells**

(A-B) Maximum-intensity projections of confocal images showing wild type (A) and *mpv17*<sup>a9/a9</sup> (B) neuromasts exposed to FM1-43FX. (C) Mean intensity of FM1-43FX is reduced in *mpv17*<sup>a9/a9</sup> neuromasts (\*\*\*P=0.0002). Scale bar: 5  $\mu$ m.

(Toro et al., 2015). We observed significantly reduced uptake of this dye in *mpv17*<sup>a9/a9</sup> neuromasts relative to wild type (Fig. 3 C; Unpaired t test

128 \*\*\*P=0.0002),

## Mpv17's role in hair-cell homeostasis and damage

129 suggesting impaired mechanotransduction in *mpv17<sup>a9/a9</sup>* hair cells. Collectively, these results  
130 support that mitochondrial homeostasis is disrupted in *mpv17<sup>a9/a9</sup>* hair cells, and that hair-cell  
131 transduction is also reduced.

### 132 *mpv17<sup>a9/a9</sup>* hair cells are more susceptible to neomycin-induced death

133 A recent study demonstrated that zebrafish mutants with elevated ROS are more  
134 vulnerable to neomycin-induced hair-cell loss (Alassaf, Daykin, Mathiapparanam, & Wolman,  
135 2019). It has also been shown that elevated mitochondrial  $Ca^{2+}$  or  $\Delta\Psi_m$  increases sensitivity to  
136 neomycin (Esterberg et al., 2014). On the other hand, it is known that neomycin enters hair cells  
137 through mechanotransduction channels, and blocking mechanotransduction can reduce  
138 neomycin sensitivity (Alharazneh et al., 2011; Hailey, Esterberg, Linbo, Rubel, & Raible, 2017;  
139 Owens et al., 2009). We therefore exposed *mpv17<sup>a9/a9</sup>* and wild type sibling larvae to a low dose  
140 of neomycin to determine whether *mpv17<sup>a9/a9</sup>* larvae are more or less sensitive to neomycin-  
141 induced hair-cell death. Both groups lost a significant number of hair cells following exposure to  
142 10  $\mu$ M neomycin (Fig. 4; Repeated measure two-way ANOVA \*\*\*\* $P < 0.0001$  wild type;  
143 \*\*\*\* $P < 0.0001$  *mpv17<sup>-/-</sup>*), however this loss was significantly more severe in *mpv17<sup>a9/a9</sup>* larvae  
144 (Repeated measure two-way ANOVA \*\*\* $P = 0.0007$ ). Thus, loss of Mpv17 increases sensitivity to  
145 neomycin-induced hair-cell death.

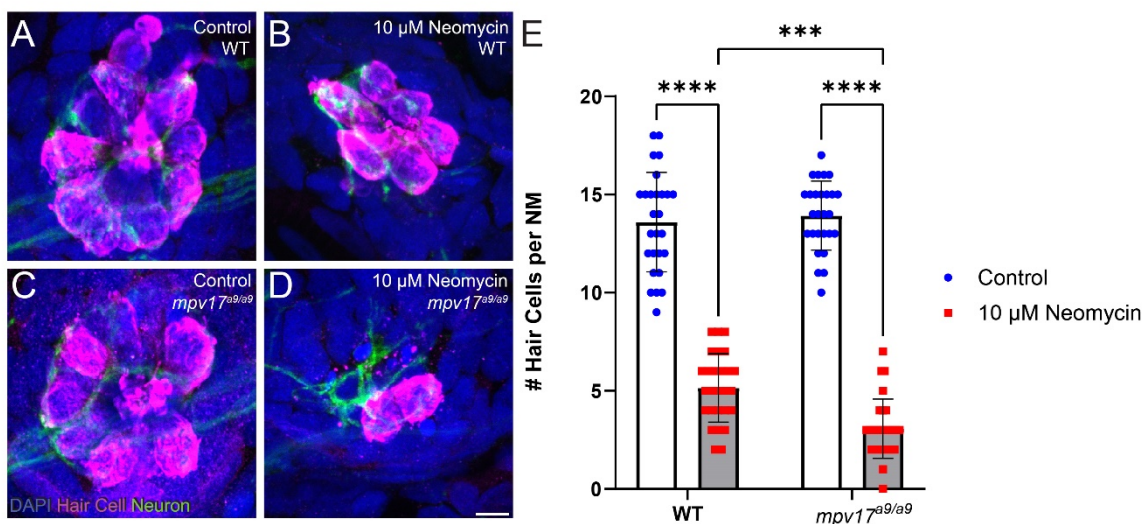

**Figure 4. *mpv17<sup>a9/a9</sup>* larvae are more sensitive to neomycin-induced hair-cell loss**

(A-D) Maximum-intensity projections of confocal images of wild type (A,B) and *mpv17<sup>a9/a9</sup>* (C,D) control neuromasts (A,C) or exposed to 10  $\mu$ M neomycin (B,D). Hair cells were visualized with immunolabel of Parvalbumin (magenta), afferent neurites are expressing GFP (green), and all cell nuclei are labeled with DAPI (blue). (E) Number of hair cells per neuromasts was significantly reduced in neuromasts exposed to 10  $\mu$ M neomycin, but *mpv17<sup>a9/a9</sup>* neuromasts were significantly more sensitive than wild type (\*\*\*\* $P < 0.0001$ , \*\*\* $P = 0.0007$ ). Scale bar: 5  $\mu$ m.

## Mpv17's role in hair-cell homeostasis and damage

### 146 *mpv17<sup>a9/a9</sup>* hair cells are more vulnerable to mechanically-induced morphological disruption and 147 hair-cell loss

148 We have previously reported a protocol to mechanically overstimulate zebrafish lateral  
149 line organs using strong water current (Holmgren et al., 2021). This stimulation resulted in  
150 phenotypes including mechanical disruption of neuromast morphology, loss of hair cells, neurite  
151 retraction, and loss of hair-cell synapses. To determine the effects of impaired mitochondrial  
152 homeostasis on mechanically induced lateral-line damage, we exposed 7-day-old *mpv17<sup>a9/a9</sup>*  
153 larvae and wild type siblings to strong water current, then fixed them for immunohistochemical  
154 labeling of hair cells, neurites, and synaptic components (Fig. 5 A-C). As indicated in our  
155 previous study, image analysis was performed on blinded samples. As in our previous study, in  
156 fish exposed to strong water current we observed two distinct morphological profiles of the  
157 neuromasts: “normal” in which the neuromasts appeared identical to controls with the hair cells  
158 arranged in a typical rosette structure (Fig. 5 B), or “disrupted,” in which the neuromasts were  
159 displaced on their sides with elongated and misshapen hair cells and the apical ends of the hair  
160 cells oriented posteriorly (Fig 5 C). In stimulus exposed wild type fish, we observed disrupted  
161 morphology in 41% of the neuromasts surveyed. We observed this morphological change more

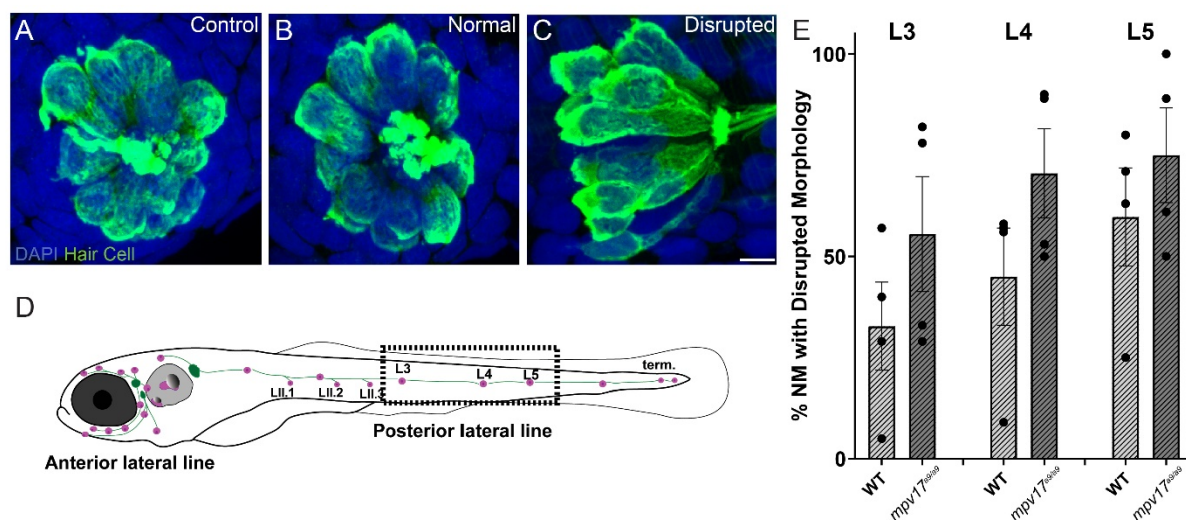

**Figure 5. Mechanical injury results in morphological disruption of neuromasts more frequently in *mpv17<sup>a9/a9</sup>* larvae than in wild type**

(A-C) Maximum-intensity projections of confocal images showing hair cells labeled with Parvalbumin and all nuclei labeled with DAPI in control neuromasts (A) and strong water current exposed neuromasts with normal (B) or disrupted (C) morphology. (D) Schematic of larval zebrafish indicating the placement of neuromasts (pink dots) and afferent nerves (green lines). Neuromasts L3-5 (dashed rectangle) were examined in this study. (E) Quantification of disrupted neuromasts. Each point indicates the percentage of neuromasts with disrupted morphology in a single experimental trial. The frequency of disrupted neuromasts was higher in the more posterior L5 neuromasts, *mpv17<sup>a9/a9</sup>* neuromasts showed disrupted morphology more frequently than wild type. Scale bar: 5  $\mu$ m.

## Mpv17's role in hair-cell homeostasis and damage

162 frequently in the more posterior L5 neuromasts compared to the more anterior L3 neuromasts  
 163 (Fig. 5 E; 56% L5; 39% L4; 27% L3). We observed in *mpv17<sup>a9/a9</sup>* larvae a similar trend of  
 164 increased morphological disruption in the more posterior neuromasts, however the frequency of

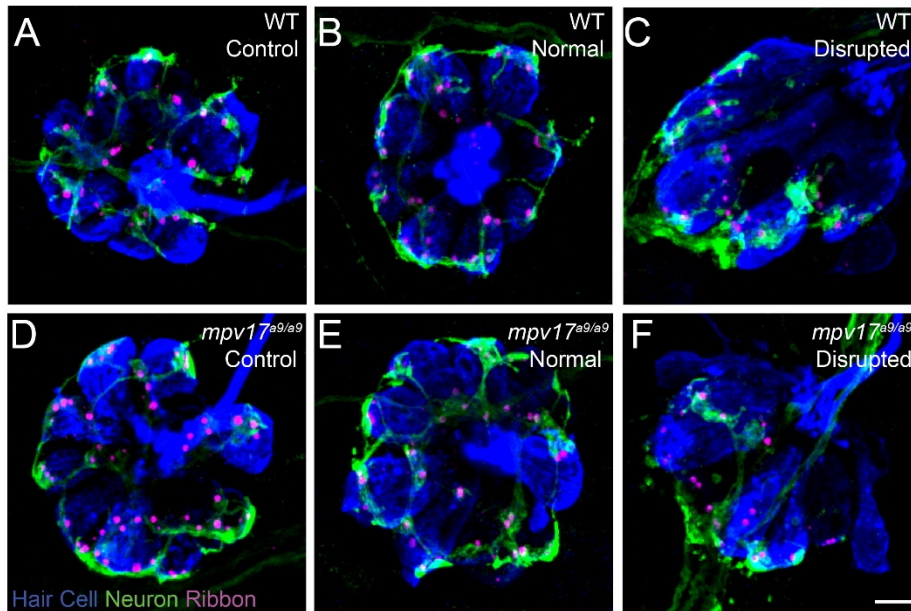

**Figure 6. Wild type and *mpv17<sup>a9/a9</sup>* neuromasts show loss of hair cells and afferent innervation following mechanical overstimulation**

(A-F) Maximum-intensity projections of confocal images showing neuromasts with Parvalbumin-labeled hair cells (blue) and Ribeye b-labeled presynaptic ribbons (magenta). Neurod:GFP-labeled afferent neurites are also shown (green). Unexposed control neuromasts are shown in (A; wild type (WT)) and (D; *mpv17<sup>a9/a9</sup>*); exposed neuromasts with normal morphology are shown in (B; WT) and (E; *mpv17<sup>a9/a9</sup>*); and exposed neuromasts with disrupted morphology are shown in (C; WT) and (F; *mpv17<sup>a9/a9</sup>*). (G-H) Quantification of hair cells per neuromast shows a significant loss of hair cells in exposed *mpv17<sup>a9/a9</sup>*-neuromasts (G; \* $P=0.0117$ ), which is specific to disrupted neuromasts (H; \* $P=0.0180$ ; \*\*\*\* $P<0.0001$ ). (I-J) Percentage of hair cells with GFP-labeled contacts. We observed significant neurite retraction (I; \*\*\* $P=0.0002$  (WT); \*\*\* $P=0.0005$  (*mpv17<sup>a9/a9</sup>*)), which is also specific to disrupted neuromasts only (J; \*\*\* $P=0.0002$  (WT); \*\*\* $P=0.0005$  (*mpv17<sup>a9/a9</sup>*)). Scale bar: 5  $\mu\text{m}$ .

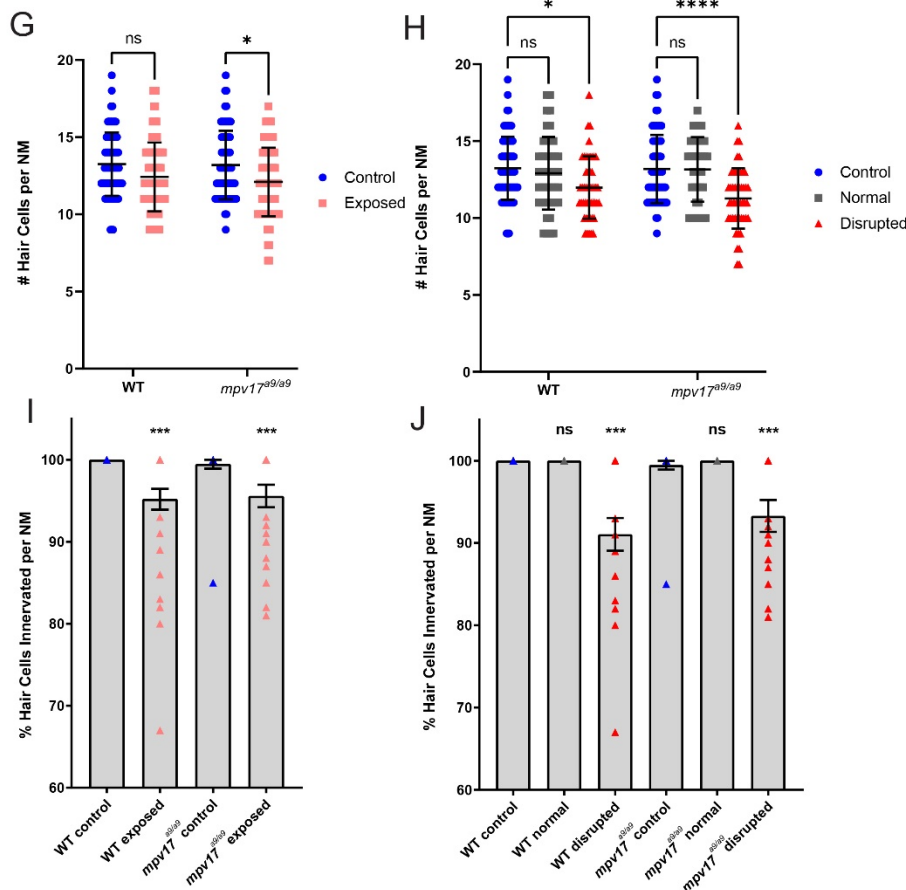



## Mpv17's role in hair-cell homeostasis and damage

165 disrupted neuromasts was higher in mechanically injured *mpv17<sup>a9/a9</sup>* larvae compared to wild  
166 type siblings concurrently exposed to the same stimulus (75% L5; 69% L4; 52% L3). Thus,  
167 *mpv17<sup>a9/a9</sup>* neuromasts appear to be more vulnerable to morphological disruption resulting from  
168 mechanical injury.

169 We then compared hair-cell numbers between mechanically injured *mpv17<sup>a9/a9</sup>* and wild  
170 type neuromasts. Wild type sibling fish exhibited a slight decrease in the number of hair cells  
171 per neuromast (Fig. 6 G; Repeated measure two-way ANOVA  $P=0.0791$ ). Similarly, *mpv17<sup>a9/a9</sup>*  
172 larvae exposed to the same stimulus showed a significant decrease in hair-cell number  
173 (Repeated measure two-way ANOVA  $*P=0.0117$ ). In both groups, this reduction in hair-cell  
174 number was specific to disrupted neuromasts; hair-cell numbers in exposed neuromasts with  
175 “normal” hair-cell morphology were comparable to control (Fig. 6 H; Repeated measure two-way  
176 ANOVA  $P=0.9624$  wild type normal;  $P=0.0180$  wild type disrupted;  $P>0.9999$  *mpv17<sup>a9/a9</sup>* normal;  
177  $****P<0.0001$  *mpv17<sup>a9/a9</sup>* disrupted). We also observed a significant reduction in the percentage  
178 of hair cells per neuromast with *neurod:EGFP* labeled afferent contacts in both wild type and  
179 *mpv17<sup>a9/a9</sup>* neuromasts (Fig. 6 I; One sample Wilcoxon test  $***P=0.0002$  wild type;  $***P=0.0005$   
180 *mpv17<sup>a9/a9</sup>*). Similar to the reduction in hair-cell number, this neurite retraction phenotype was  
181 evident only in “disrupted” neuromasts of both groups (Fig. 6 J; One sample Wilcoxon test  
182  $***P=0.0002$  wild type disrupted;  $***P=0.0005$  *mpv17<sup>a9/a9</sup>* disrupted). Taken together, these  
183 results demonstrate that *mpv17<sup>a9/a9</sup>* neuromasts are more susceptible to mechanically induced  
184 morphological disruption and hair-cell loss, but that impaired mitochondrial function does not  
185 affect sensitivity to afferent retraction resulting from mechanical injury.

### 186 Wild type and *mpv17<sup>a9/a9</sup>* hair cells show comparable synapse loss following mechanical 187 overstimulation

188 Recent studies indicate hair-cell mitochondrial activity plays a key role in synaptic  
189 maintenance (Wang et al., 2018; Wong et al., 2019). We have previously shown that  
190 mechanical overstimulation resulted in loss of hair-cell synapses, as well as changes in synapse  
191 morphology (Holmgren et al., 2021). To determine the effect of impaired mitochondrial function  
192 on synapse number following mechanical overstimulation, we exposed *mpv17<sup>a9/a9</sup>* fish and their  
193 wild type siblings, then immunolabeled synaptic components and quantified intact synapses,  
194 defined as presynaptic ribbons colocalized with postsynaptic densities (PSD) (Fig. 7 A-F). In  
195 mechanically overstimulated wild type neuromasts, we observed a statistically significant  
196 decrease in the number of intact synapses per hair cell (Fig. 7 G; Repeated measure two-way  
197 ANOVA  $**P=0.0016$  wild type). In agreement with our previous study, this loss of synapses

## Mpv17's role in hair-cell homeostasis and damage

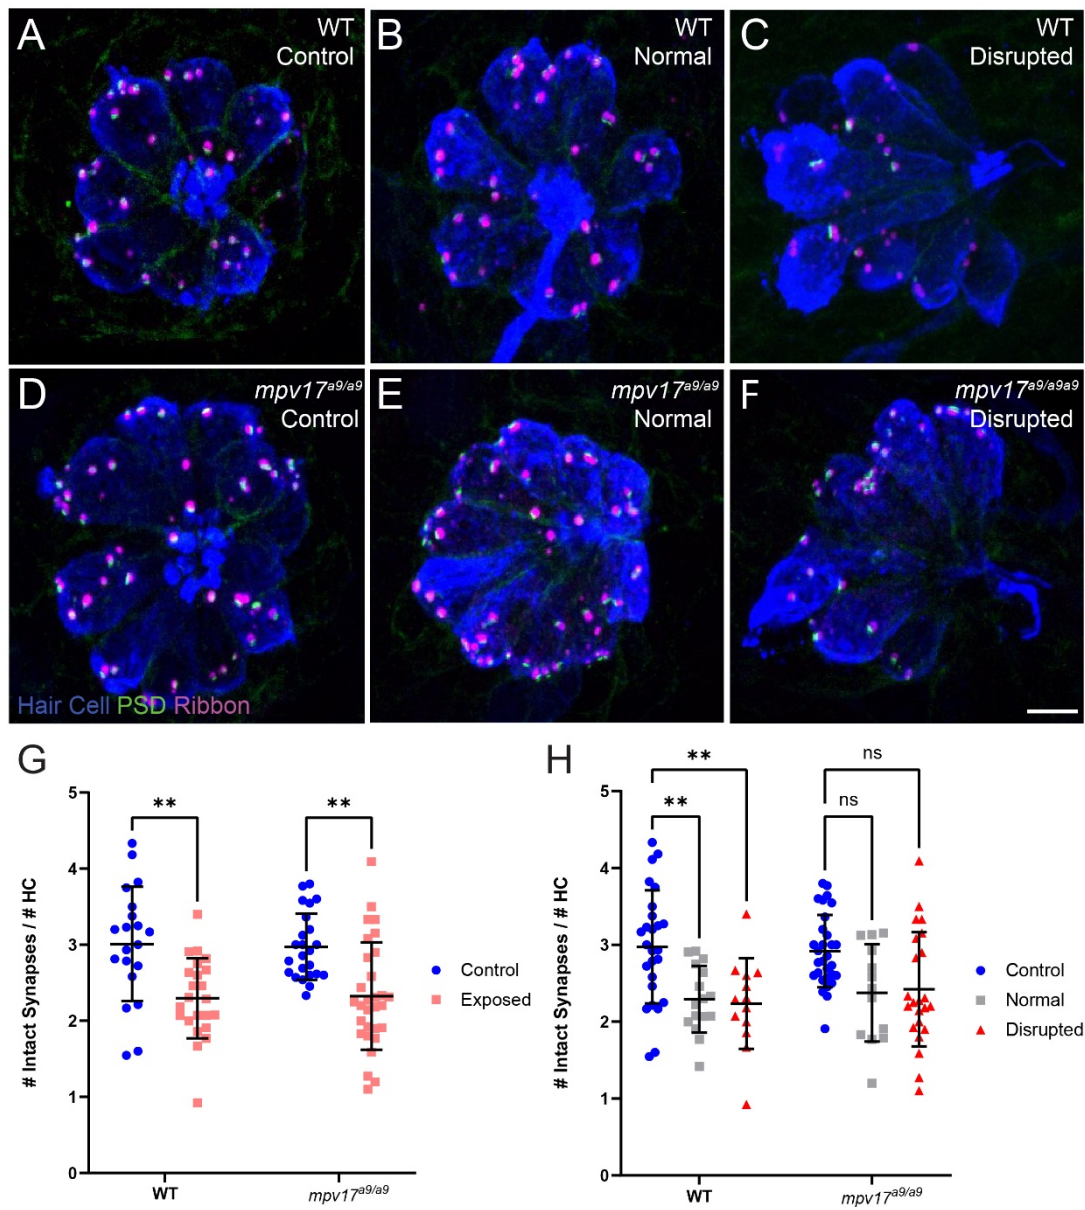

**Figure 7. Both wild type and *mpv17<sup>a9/a9</sup>* neuromasts experience mechanically induced hair-cell synapse loss**

(A-C) Maximum-intensity projections of confocal images showing neuromasts with Parvalbumin-labeled hair cells (blue), Ribeye b-labeled presynaptic ribbons (magenta), and MAGUK-labeled PSD (green). Unexposed control neuromasts are shown in (A; wild type (WT)) and (D; *mpv17<sup>a9/a9</sup>*); exposed neuromasts with normal morphology are shown in (B; WT) and (E; *mpv17<sup>a9/a9</sup>*); and exposed neuromasts with disrupted morphology are shown in (C; WT) and (F; *mpv17<sup>a9/a9</sup>*). (G-H) Quantification of intact synapses per hair cell. Each data point refers to the average number of intact synapses per hair cell in one neuromast. Synapse number is reduced in both wild type and *mpv17<sup>a9/a9</sup>* neuromasts (G; \*\*P=0.0016 WT; \*\*P=0.0014 *mpv17<sup>a9/a9</sup>*). This reduction was consistent in both normal and disrupted neuromasts (H; \*\*P=0.0090 WT normal; \*\*P=0.0079 WT disrupted). Scale bar: 5  $\mu$ m.

## Mpv17's role in hair-cell homeostasis and damage

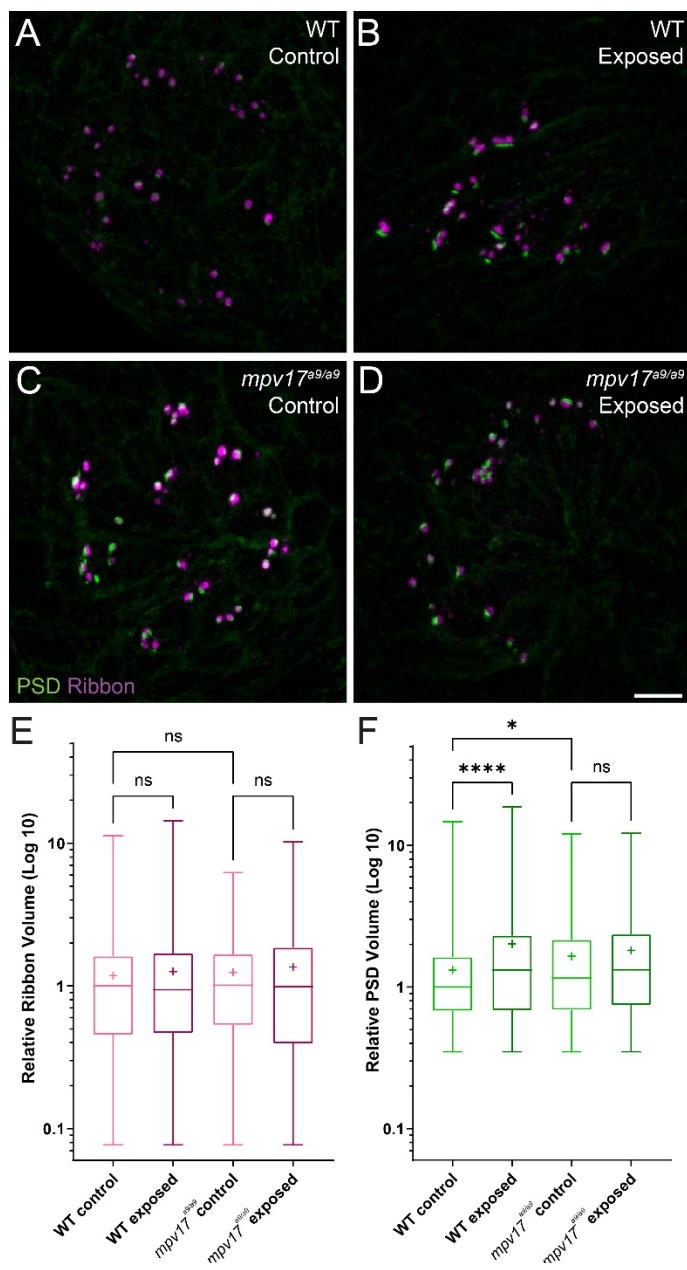

**Figure 8. PSDs are enlarged in *mpv17<sup>a9/a9</sup>* neuromasts but do not significantly change upon mechanical overstimulation**

(A-D) Maximum-intensity projections of confocal images of wild type (A,B) and *mpv17<sup>a9/a9</sup>* (C,D) neuromasts, either unexposed (A,C) or exposed to strong water current (B,D). (E) Quantification of presynaptic ribbon volume relative to unexposed wild type control. (F) Quantification of PSD volume relative to wild type control. PSDs are enlarged in unexposed *mpv17<sup>a9/a9</sup>* neuromasts and mechanically overstimulated wild type neuromasts, but there is no significant change in PSD size in mechanically overstimulated *mpv17<sup>a9/a9</sup>* neuromasts (\*\*\*\* $P < 0.0001$  WT exposed; \* $P = 0.0100$  *mpv17<sup>a9/a9</sup>* control). Scale bar: 5  $\mu\text{m}$ .

occurred in all exposed neuromasts i.e. both normal and disrupted morphologies (Repeated measure two-way ANOVA \*\* $P = 0.0090$  wild type normal; \*\* $P = 0.0079$  wild type disrupted), suggesting that synapse loss may be a consequence of hair-cell overstimulation rather than physical mechanical injury. In mechanically overstimulated *mpv17<sup>a9/a9</sup>* fish, we observed a similar reduction in synapse number (Repeated measure two-way ANOVA \*\* $P = 0.0014$ ), and this trend of synapse loss occurred in all exposed neuromasts (Repeated measure two-way ANOVA  $P = 0.0948$  *mpv17<sup>a9/a9</sup>* normal;  $P = 0.0505$  *mpv17<sup>a9/a9</sup>* disrupted). The similarity in synapse loss between mutants and wild type siblings suggest loss of Mpv17 does not dramatically affect mechanically induced synapse loss. Also notable was that unexposed control wild type and *mpv17<sup>a9/a9</sup>* fish had a comparable number of synapses per hair cell (Fig. 7 G;  $P = 0.9973$ ) indicating that chronic mitochondrial dysfunction in *mpv17<sup>a9/a9</sup>* hair cells does not affect synaptic maintenance.

Studies in mammals have shown that noise exposures modulate the sizes of inner hair cell pre- and postsynaptic components (Kim et al., 2019; Song et al., 2016). We have also previously demonstrated that mechanical overstimulation of the lateral line resulted

## Mpv17's role in hair-cell homeostasis and damage

233 in enlarged PSDs (Holmgren et al., 2021). We thus measured the relative volumes of  
234 presynaptic ribbons and PSDs in *mpv17<sup>a9/a9</sup>* larvae and wild type siblings following mechanical  
235 overstimulation. We observed no significant change in the sizes of presynaptic ribbons in either  
236 wild type or *mpv17<sup>a9/a9</sup>* exposed neuromasts immediately following exposure (Fig. 8 E; Kruskal-  
237 Wallis test  $P=0.6165$ ). When we compared PSD volumes, we observed enlarged PSD in  
238 unexposed *mpv17<sup>a9/a9</sup>* control neuromasts relative to wild type (Fig. 8 C,F; Dunn's multiple  
239 comparison test  $*P=0.0100$ ). In mechanically overstimulated wild type neuromasts, there was a  
240 dramatic increase in PSD size relative to control (Fig. 8 B,F; Dunn's multiple comparison test  
241  $****P<0.0001$ ). By contrast, in exposed *mpv17<sup>a9/a9</sup>* neuromasts, there was a modest,  
242 nonsignificant increase in PSD size relative to control, and the increase was less dramatic than  
243 in wild type (Fig. 8 D,F; Dunn's multiple comparison test  $P=0.1787$ ). These results reveal  
244 *mpv17<sup>a9/a9</sup>* mutant hair cells possess somewhat enlarged PSDs under homeostatic conditions  
245 and undergo less dramatic changes in PSD size following mechanical overstimulation relative to  
246 wild type.

## 247 Discussion

### 248 Effects of Mpv17 deficiency in zebrafish lateral-line hair cells

249 In this study, we have characterized the effects of Mpv17 deficiency on lateral-line hair  
250 cells, both under homeostatic conditions and in response to mechanical overstimulation.  
251 Mitochondrial homeostasis appeared to be disrupted, as we observed in *mpv17<sup>a9/a9</sup>* mutant hair  
252 cells elevated ROS and mitochondrial  $Ca^{2+}$ , as well as hyperpolarized  $\Delta\Psi_m$ . Mpv17-deficient  
253 hair cells showed reduced FM1-43 uptake and were more susceptible to neomycin-induced  
254 death. Following mechanical overstimulation, *mpv17<sup>a9/a9</sup>* neuromasts were more vulnerable to  
255 morphological disruption and hair-cell loss than wild type siblings, but showed similar degrees of  
256 de-innervation and synapse loss.

257 To our knowledge, while the transparent Casper mutant line of zebrafish is commonly  
258 used in research, this is the first investigation of the role of Mpv17 in lateral-line hair-cell  
259 mitochondrial dynamics. Mpv17 function has been studied more extensively in mammalian  
260 models (Binder, Weiher, Exner, & Kerjaschki, 1999; Meyer zum Gottesberge et al., 2001; Meyer  
261 zum Gottesberge et al., 2012; Muller et al., 1997). In mice, loss of Mpv17 results in severe  
262 defects in the kidney and inner ear. In humans, severe *MPV17* deficiency has been associated  
263 with a hepatocerebral form of mitochondrial DNA depletion syndrome which results in death due  
264 to liver failure at young ages, while less severe mutations have been linked to juvenile-onset  
265 peripheral neuropathy (Baumann et al., 2019; El-Hattab et al., 2018; Spinazzola et al., 2008).  
266 The phenotypes observed in *mpv17<sup>a9/a9</sup>* zebrafish are much milder than those reported in

## Mpv17's role in hair-cell homeostasis and damage

267 mammals, as homozygous mutants appear healthy and have normal lifespans. Paralogous  
268 genes in zebrafish may provide compensatory mechanisms for loss of Mpv17 (Glasauer &  
269 Neuhauss, 2014). Zebrafish have two *mpv17*-like genes, *mpv17l* and *mpv17l2*, and *mpv17l2* is  
270 upregulated in *mpv17<sup>a9/a9</sup>* fish (Krauss et al., 2013; Martorano et al., 2019). While it is known that  
271 *mpv17l2* is strongly expressed in the larval zebrafish liver (Thisse, 2004), it remains to be  
272 determined whether *mpv17l2* is expressed specifically in hair cells.

### 273 Mitochondrial homeostasis in *mpv17<sup>a9/a9</sup>* hair cells

274 Mpv17-deficient hair cells showed elevated ROS and mitochondrial  $\text{Ca}^{2+}$ , as well as a  
275 more negative  $\Delta\Psi_m$  (Fig. 1,2). Mitochondrial  $\text{Ca}^{2+}$ , ROS production, and  $\Delta\Psi_m$  are tightly linked in  
276 the cell (Adam-Vizi & Starkov, 2010; Brookes, Yoon, Robotham, Anders, & Sheu, 2004;  
277 Esterberg et al., 2014; Gorlach, Bertram, Hudecova, & Krizanova, 2015; Ivannikov & Macleod,  
278 2013). ROS are generated in the mitochondria as a consequence of oxidative phosphorylation,  
279 which depends on a negative  $\Delta\Psi_m$ . Negative  $\Delta\Psi_m$  is also maintained by removing protons from  
280 the mitochondrial matrix as electrons flow through the electron transport chain. A more negative  
281  $\Delta\Psi_m$  thus results in more ROS (Kann & Kovacs, 2007; Zorov, Juhaszova, & Sollott, 2014).  
282 Mitochondrial  $\text{Ca}^{2+}$  regulates oxidative phosphorylation, so the elevated mitochondrial  $\text{Ca}^{2+}$   
283 observed in *mpv17<sup>a9/a9</sup>* hair cells we observed also contributes to increased ROS and  $\Delta\Psi_m$   
284 (Brookes et al., 2004).

285 Similar hair-cell phenotypes were recently reported in *pappaa<sup>p170</sup>* mutant zebrafish:  
286 *pappaa<sup>p170</sup>* hair cells had elevated mitochondrial  $\text{Ca}^{2+}$ , elevated ROS, and hyperpolarized  
287 mitochondria (Alassaf et al., 2019). Additionally, these mutants were more sensitive to  
288 neomycin-induced hair-cell loss, similar to what we observed in *mpv17<sup>a9/a9</sup>* neuromasts (Fig. 4).  
289 One notable difference between *pappaa<sup>p170</sup>* and *mpv17<sup>a9/a9</sup>* mutant hair cells is that the  
290 significantly reduced FM1-43 uptake we observed in *mpv17<sup>a9/a9</sup>* mutants (Fig. 3) was not  
291 observed in *pappaa<sup>p170</sup>*, indicating that the driving force for cations through  
292 mechanotransduction channels is decreased in *mpv17<sup>a9/a9</sup>* but not *pappaa<sup>p170</sup>* mutants. Given  
293 that neomycin uptake is likely reduced in *mpv17<sup>a9/a9</sup>* mutant hair cells (Hailey et al., 2017), our  
294 observations support that mitochondrial dysfunction is the main source of increased vulnerability  
295 to neomycin. In *pappaa<sup>p170</sup>* mutants, this susceptibility was rescued by treatment with the ROS  
296 scavenger mitoTEMPO, supporting that attenuating oxidative stress could rescue *mpv17<sup>a9/a9</sup>*  
297 susceptibility to neomycin. Additionally, a study defining neomycin-induced hair-cell death  
298 showed that mitochondrial  $\text{Ca}^{2+}$  uptake in zebrafish neuromast hair cells is a precursor to cell  
299 death, so it is possible that the elevated mitochondrial  $\text{Ca}^{2+}$  observed in *mpv17<sup>a9/a9</sup>* hair cells  
300 may contribute to the heightened sensitivity (Esterberg et al., 2014). This study also

## Mpv17's role in hair-cell homeostasis and damage

301 demonstrated that  $\Delta\Psi_m$  plays a role in neomycin ototoxicity such that partially depolarizing the  
302 mitochondria with sub-lethal levels of FCCP offered a protective effect. Cumulatively, our  
303 observations in *mpv17<sup>a9/a9</sup>* hair cells provide additional support to the idea that mitochondrial  
304 dysfunction underlies enhanced susceptibility to neomycin-induced hair-cell death, and that  
305 drugs targeting ROS or that uncouple mitochondrial phosphorylation may provide therapeutic  
306 protection.

307 In larvae exposed to strong water current stimulus, *mpv17<sup>a9/a9</sup>* neuromasts displayed  
308 mechanical disruption of morphology more frequently than wild type siblings exposed to the  
309 same stimulus (Fig. 5). We also observed, in disrupted neuromasts, a significant decrease in  
310 hair-cell number which was exacerbated in *mpv17<sup>a9/a9</sup>* mutants (Fig. 6). In our previous study,  
311 we reported intact mechanotransduction was not required for stimulus-induced displacement of  
312 neuromasts, indicating this observed phenotype is a result of mechanical injury (Holmgren et al.,  
313 2021). While it is unclear why *mpv17<sup>a9/a9</sup>* neuromasts are more susceptible to mechanically  
314 induced displacement, it is possible that mitochondrial dysfunction in hair cells of disrupted  
315 *mpv17<sup>a9/a9</sup>* neuromasts sensitizes them to mechanically induced death. It would be interesting to  
316 know whether pharmacological manipulation of  $\Delta\Psi_m$  could affect a neuromast's vulnerability to  
317 mechanical injury and hair-cell loss. As *mpv17<sup>a9/a9</sup>* hair cells also showed elevated ROS (Fig. 1),  
318 oxidative stress could also play a role in morphological disruption and hair-cell loss. Further  
319 examination of ROS levels in mechanically overstimulated hair cells will be important to fully  
320 understand these mechanisms.

### 321 Mechanical overstimulation and hair-cell synapse loss

322 It has been established that moderate noise exposure results in a loss of hair-cell  
323 synapses in the cochlea, but the mechanisms underlying noise-induced synapse loss are not  
324 completely understood (Kujawa & Liberman, 2009). Recent studies have defined roles of  
325 mitochondrial  $\text{Ca}^{2+}$  in synaptic maintenance and noise-induced synapse loss (Wang et al., 2018;  
326 Wong et al., 2019). One mechanism by which  $\text{Ca}^{2+}$  is taken up by mitochondria is via the  
327 mitochondrial  $\text{Ca}^{2+}$  uniporter (MCU) (Wong et al., 2019). Both inhibition of MCU by Ru360 and  
328 genetic deletion of MCU have been shown to prevent hair-cell synapse loss in noise-exposed  
329 mice (Wang et al., 2018). These observations support that mitochondrial  $\text{Ca}^{2+}$  uptake plays a  
330 critical role in noise-induced synapse loss. We have shown here that *mpv17<sup>a9/a9</sup>* hair cells have  
331 elevated mitochondrial  $\text{Ca}^{2+}$  levels, as measured by the genetically encoded mitochondrial  $\text{Ca}^{2+}$   
332 indicator MitoGCaMP3 (Fig. 1) (Esterberg et al., 2014). It would therefore be unsurprising if  
333 elevated mitochondrial  $\text{Ca}^{2+}$  in *mpv17<sup>a9/a9</sup>* hair cells contributed to more severe hair-cell synapse  
334 loss following mechanical overstimulation. However, here we observed similar degrees of

## Mpv17's role in hair-cell homeostasis and damage

335 synapse loss in both wild type and *mpv17<sup>ag/ag</sup>* stimulus exposed neuromasts (Fig. 8), suggesting  
336 an alternate mechanism is at play.

337 It has recently been shown that *Vglut3<sup>-/-</sup>* null mutant mice do not lose hair-cell synapses  
338 following noise exposure, supporting a role for synaptic transmission in noise-induced synapse  
339 loss (Kim et al., 2019). Additionally, in our previous study of mechanical injury in the zebrafish  
340 lateral line, we observed significantly more severe mechanically-induced hair-cell synapse loss  
341 in fish when glutamate clearance from the synapse was pharmacologically blocked, suggesting  
342 synapse loss can be exacerbated by excess glutamate in the synaptic cleft (Holmgren et al.,  
343 2021). Our results here show that *mpv17<sup>ag/ag</sup>* hair cells have reduced FM1-43 uptake indicating  
344 reduced hair-cell transduction (Fig. 3), which suggests synaptic transmission may also be  
345 impaired in *mpv17<sup>ag/ag</sup>* hair cells. It is possible that there is a balancing act in *mpv17<sup>ag/ag</sup>* hair  
346 cells, with elevated mitochondrial  $Ca^{2+}$  potentially tipping the scales toward more severe  
347 synapse loss, yet counter balanced by reduced hair-cell activity providing protection from  
348 glutamate excitotoxicity. Further studies will be necessary to determine the relative contribution  
349 of mitochondrial activity to mechanically induced hair-cell synapse loss.

### 350 Conclusion

351 We have shown here that mitochondrial homeostasis is disrupted in *mpv17<sup>ag/ag</sup>* hair cells  
352 of the zebrafish lateral line. Consequently, *mpv17<sup>ag/ag</sup>* neuromast hair cells are more vulnerable  
353 to neomycin- and mechanically-induced hair-cell death, but are not more susceptible to synapse  
354 loss from overstimulation. This model will be useful for future studies examining not only the  
355 relative contributions of mitochondrial function to hair-cell damage, but also the roles of  
356 mitochondrial homeostasis in subsequent repair following damage.

357

### 358 **Declaration of interests**

359 The authors declare no competing financial or non-financial interests.

### 360 **Acknowledgments**

361 This work was supported by the National Institute on Deafness and Other Communication  
362 Disorders R01DC016066 (L.S.). We would like to thank Valentin Militchin for engineering  
363 support.

364

## Mpv17's role in hair-cell homeostasis and damage

### 365 **Materials and Methods**

#### 366 Ethics statement

367 Experimental procedures were performed with approval from the Washington University  
368 School of Medicine Institutional Animal Care and Use Committee and in accordance with NIH  
369 guidelines for use of zebrafish.

#### 370 Zebrafish

371 All zebrafish experiments and procedures were performed in accordance with the  
372 Washington University Institutional Animal Use and Care Committee. Adult zebrafish were  
373 raised under standard conditions at 27-29°C in the Washington University Zebrafish Facility.  
374 Embryos were raised in incubators at 28°C in E3 media (5 mM NaCl, 0.17 mM KCl, 0.33 mM  
375 CaCl<sub>2</sub>, 0.33 mM MgCl<sub>2</sub>; (Nüsslein-Volhard & Dahm, 2002) with a 14 h:10 h light:dark cycle.  
376 After 4 dpf, larvae were raised in 100-200 ml E3 media in 250-ml plastic beakers and fed rotifers  
377 daily. Sex of the animal was not considered for this study because sex cannot be determined in  
378 larval zebrafish.

379 The transgenic lines *TgBAC(neurod1:EGFP)* and *Tg(myo6b:mitoGCaMP3)* were used in  
380 this study (Esterberg et al., 2014; Obholzer et al., 2008). Fluorescent transgenic larvae were  
381 identified at 3-5 days post-fertilization (dpf) under anesthesia with 0.01% tricaine in E3 media.  
382 The *TgBAC(neurod1:EGFP)* and *Tg(myo6b:mitoGCaMP3)* lines were crossed into Casper  
383 compound mutants (*mitfa<sup>w2/w2</sup>*, *mpv17<sup>a9/a9</sup>*) (White et al., 2008). Homozygous *mpv17<sup>a9/a9</sup>* mutants  
384 were identified at 3-5 dpf by phenotype under a brightfield dissecting microscope based on the  
385 severe reduction of iridophores in the eyes (D'Agati et al., 2017).

#### 386 Experimental apparatus

387 This experimental device was previously described in (Holmgren et al., 2021). In brief, 6-  
388 well plates containing larvae were clamped to a custom magnesium head expander (Vibration &  
389 Shock Technologies, Woburn, MA) on a vertically-oriented Brüel+Kjær LDS Vibrator, V408  
390 (Brüel and Kjær, Naerum, Denmark). The apparatus was housed in a custom sound-attenuation  
391 chamber. An Optiplex 3020 Mini Tower (Dell) with a NI PCIe-6321, X Series Multifunction DAQ  
392 (National Instruments) running a custom stimulus generation program (modified version of  
393 Cochlear Function Test Suite) was used to relay the stimulus signal to a Brüel+Kjær LDS  
394 PA100E Amplifier that drove a controlled 60 Hz vibratory stimulus along the plate's dorsoventral  
395 axis (vertically). Two accelerometers (BU-21771, Knowles, Itasca, IL) were mounted to the head  
396 expander to monitor the vertical displacement of the plate. The output of the accelerometers



## Mpv17's role in hair-cell homeostasis and damage

397 was relayed through a custom accelerometer amplifier (EPL Engineering Core). A block  
398 diagram for the EPL Lateral Line Stimulator can be found here:  
399 [https://www.masseyeandear.org/research/otolaryngology/eaton-peabody-](https://www.masseyeandear.org/research/otolaryngology/eaton-peabody-laboratories/engineering-core)  
400 [laboratories/engineering-core.](https://www.masseyeandear.org/research/otolaryngology/eaton-peabody-laboratories/engineering-core)

### 401 Mechanical overstimulation of zebrafish larvae

402 Larval zebrafish were exposed to strong water current as previously described  
403 (Holmgren et al., 2021). At 7 dpf, free-swimming zebrafish larvae were placed in untreated 6-  
404 well plates (Corning, Cat# 3736; well diameter: 34.8 mm; total well volume: 16.8 ml) with 6 ml  
405 E3 per well, pre-warmed to 28°C. Up to 20 larvae were placed in each well. Individual wells  
406 were sealed with Glad® Press 'n Seal plastic food wrap prior to placing the lid on the plate. An  
407 additional metal plate was fitted to the bottom of the multi-well dish to fill a small gap between  
408 the bottoms of the wells and the head expander.

409 Exposures (stimulus parameters: 60 Hz,  $46.2 \pm 0.3$  m/s<sup>2</sup>) were conducted at room  
410 temperature (22-24°C) up to 2 hours after dawn. Exposure consisted of 20 minutes of  
411 stimulation followed by a 10-minute break and 2 hours of uninterrupted stimulation. During the  
412 entire duration of exposure, unexposed control fish were kept in the same conditions as noise-  
413 exposed fish i.e. placed in a multi-well dish and maintained in the same room as the exposure  
414 chamber. After exposure, larvae were immediately fixed for histology.

### 415 Pharmacology

416 To assess hair-cell sensitivity to aminoglycosides, 5-6 dpf larvae were exposed to 10 µM  
417 neomycin (Sigma) in E3 for 30 minutes at 28°C. Larvae were then rinsed in E3 and allowed to  
418 recover for 2 hours at 28°C before being fixed for immunohistochemical labeling of hair cells.

419 To verify that entry of MitoTracker dyes into hair cells was not dependent on  
420 mechanotransduction, 7 dpf larvae were exposed to 5 mM BAPTA (Invitrogen) in E3 for 10  
421 minutes, then rinsed in E3. MitoTracker probes were calibrated by treating fish with cyclosporin  
422 A (TCI America). Larvae were exposed to 200 nM cyclosporin A alone in E3 with 0.1% DMSO  
423 for 5 minutes prior to co-exposure with MitoTracker probes and drug for 30 minutes.

### 424 Live hair-cell labeling

425 Hair cell nuclei were specifically labeled by briefly exposing free-swimming larvae to 4',6-  
426 Diamidino-2-Phenylindole (DAPI; Invitrogen/ThermoFisher) diluted to 2.5 µg/ml in E3. Prior to  
427 exposure to mechanical stimulation or incubation with other indicators, larvae were exposed to  
428 DAPI working solution for 4 minutes, then rinsed 3 times in E3.

## Mpv17's role in hair-cell homeostasis and damage

429 CellROX Green (Invitrogen) was used to quantify levels of ROS in hair cells. Larvae  
430 were exposed to 5  $\mu$ M CellROX Green in E3 for 30 minutes at 28°C, protected from light.  
431 Larvae were then rinsed twice in E3 and prepared for live imaging. Larvae were maintained in  
432 the dark prior to imaging.

433 The fixable vital dye FM1-43FX (Invitrogen) was used to quantify hair-cell  
434 mechanotransduction as previously described (Holmgren et al., 2021). In brief, 7 dpf larvae  
435 were exposed to 3  $\mu$ M FM1-43FX in E3 for 20 seconds then rinsed in E3. Larvae were then  
436 fixed (4% paraformaldehyde, 4% sucrose, 150  $\mu$ M CaCl<sub>2</sub> in 0.1 M phosphate buffer) overnight at  
437 4°C and mounted on slides with elvanol (13% w/v polyvinyl alcohol, 33% w/v glycerol, 1% w/v  
438 DABCO (1,4 diazobicyclo[2,2,2] octane) in 0.2 M Tris, pH 8.5).

439 We chose to use MitoTracker Red CMXRos and MitoTracker Deep Red (Invitrogen) to  
440 measure mitochondrial membrane potential because they are well retained after fixation (Mot et  
441 al., 2016; Pendergrass et al., 2004). 7 dpf larvae were exposed to 500 nM MitoTracker Red  
442 CMXRos and 500 nM MitoTracker Deep Red concurrently in E3 for 30 minutes at 28°C,  
443 protected from light. Larvae were then rinsed in E3, fixed in 4% paraformaldehyde in PBS  
444 overnight at 4°C, and mounted on slides with elvanol.

### 445 Whole-mount immunohistochemistry

446 Larvae were briefly sedated on ice and fixed (4% paraformaldehyde, 4% sucrose, 150  
447  $\mu$ M CaCl<sub>2</sub> in 0.1 M phosphate buffer) for 5 hours at 4°C. Larvae were then permeabilized in ice-  
448 cold acetone, blocked (2% goat serum, 1% bovine serum albumin, 1% DMSO in PBS), and  
449 incubated with primary antibodies diluted in blocking buffer. The following commercial primary  
450 antibodies were used in this study: GFP (1:500; Aves Labs, Inc; Cat# GFP-1020), Parvalbumin  
451 (1:2000; Thermo Fisher; Cat# PA1-933), Parvalbumin (1:2000; Abcam; Cat# ab11427),  
452 Parvalbumin (1:500; Sigma-Aldrich; Cat# P3088), MAGUK (K28/86; 1:500; NeuroMab, UC  
453 Davis; Cat# 75-029), CtBP (1:2000; Santa Cruz Biotechnology Cat# sc-55502. Custom affinity-  
454 purified antibody generated against Danio rerio Ribeye b (mouse IgG2a; 1:2000) (Sheets,  
455 Trapani, Mo, Obholzer, & Nicolson, 2011). Following primary antibody incubation, larvae were  
456 washed and incubated with diluted secondary antibodies conjugated to Alexa Fluor 488, Alexa  
457 Fluor 546, Dylight 549, Alexa Fluor 555, and Alexa Fluor 647 (Invitrogen). Larvae were then  
458 counterstained with DAPI (Sigma) and mounted on slides with elvanol.

459

460

## Mpv17's role in hair-cell homeostasis and damage

### 461 Live imaging

462 Live imaging of zebrafish larvae was performed as previously described (Holmgren et  
463 al., 2021). In brief, zebrafish larvae were anesthetized with 0.01% tricaine in E3, then mounted  
464 lateral-side up on a thin layer of 1.5-2% low-melt agarose in a tissue culture dish with a cover-  
465 glass bottom (World Precision Instruments) and covered in E3 media. Z-stack images with a z  
466 step of 1  $\mu\text{m}$  (CellROX) or 0.5  $\mu\text{m}$  (mito-GCaMP3) were acquired via an ORCA-Flash 4.0 V3  
467 camera (Hamamatsu) using a Leica DM6 Fixed Stage microscope with an X-Light V2TP  
468 spinning disc confocal (60 micron pinholes) and a 63x/0.9 N.A. water immersion objective. Z-  
469 acquisition parameters w/ X-light spinning disc: 488 laser "20% power", 150 ms per frame. The  
470 perimeter of each neuromast for subsequent analysis was captured using differential  
471 interference contrast imaging following fluorescent image acquisition. Image acquisition was  
472 controlled by MetaMorph software.

### 473 Confocal imaging of fixed specimens

474 Fixed sample images were acquired using an LSM 700 laser scanning confocal  
475 microscope with a 63x 1.4 NA Plan-Apochromat oil-immersion objective (Carl Zeiss). Confocal  
476 stacks were collected with a z step of 0.3  $\mu\text{m}$  over 7-10  $\mu\text{m}$  with pixel size of 100 nm (x-y image  
477 size 51 x 51  $\mu\text{m}$ ). Acquisition parameters were established using the brightest control specimen  
478 such that just a few pixels reached saturation in order to achieve the greatest dynamic range in  
479 our experiments. For quantitative measurements such as particle volume or fluorescence  
480 intensity, parameters including gain, laser power, scan speed, dwell time, resolution, and zoom,  
481 were kept consistent between comparisons.

### 482 Confocal image processing and analysis

483 Analysis was performed on blinded images. Digital images were processed using  
484 ImageJ software (Schneider, Rasband, & Eliceiri, 2012). To correct for drift in the z direction,  
485 images were adjusted using StackReg when appropriate (Thevenaz, Ruttimann, & Unser,  
486 1998). Subsequent image processing for display within figures was performed using Illustrator  
487 software (Adobe).

488 To measure volume of synaptic puncta, raw images containing single immunolabel were  
489 subtracted for background using a 20-pixel rolling ball radius. Whole neuromasts were  
490 delineated based on Parvalbumin label in maximum-intensity projections using the freehand  
491 selection and "synchronize windows" tools. Puncta were defined as regions of immunolabel with  
492 pixel intensity above a determined threshold: threshold for Ribeye label was calculated using

## Mpv17's role in hair-cell homeostasis and damage

493 the Isodata algorithm (Ridler, 1978) on maximum-intensity projections, threshold for MAGUK  
494 label was calculated as the product of 7 times the average pixel intensity of the whole NM  
495 region in a maximum-intensity projection. Particle volume was measured using the 3D object  
496 counter using a lower threshold and minimum particle size of 10 voxels (Bolte & Cordelieres,  
497 2006). To normalize for differences in intensity across experimental trials, volume  
498 measurements were normalized to the median wild type control volume for each trial for each  
499 individual channel. Intact synapses were manually counted and defined as colocalized or  
500 adjoining MAGUK and Ribeye or CtBP puncta. The number of intact synapses per hair cell was  
501 approximated by dividing the number of synapses by the number of hair cells in the neuromast.

502 To measure fluorescence intensity of indicators across whole neuromasts, images  
503 containing single channels were background-subtracted using a rolling ball radius of the  
504 following sizes: images containing cellIROX label or mitoGCaMP3 (50-pixel), images containing  
505 FM1-43FX label (100-pixel), and images containing individual MitoTracker labels (200-pixel).  
506 Whole neuromasts were delineated based on DIC images (cellIROX label and mitoGCaMP3) or  
507 hair cell specific DAPI label in maximum-intensity projections, and mean intensity of the  
508 indicator was measured. Measurements from each experimental trial were normalized to the  
509 wild type control median value.

### 510 Statistical analysis

511 Statistical analyses were performed using Prism 9 (Graphpad Software Inc). Datasets  
512 were confirmed for normality using the D'Agostino-Pearson test when appropriate. Statistical  
513 significance between two groups was determined by an unpaired Student's t test or a Mann-  
514 Whitney U test, depending on the normality of the dataset. Statistical significance between  
515 multiple groups with normal distributions was determined by one-way ANOVA and appropriate  
516 post-hoc tests, and statistical significance between multiple groups with non-normal distributions  
517 was determined by a Kruskal-Wallis test and appropriate post-hoc tests. For datasets  
518 dependent on multiple independent variables, statistical significance was determined using two-  
519 way ANOVA and appropriate post-hoc tests.

520

521 **References**

- 522
- 523 Adam-Vizi, V., & Starkov, A. A. (2010). Calcium and mitochondrial reactive oxygen species  
524 generation: how to read the facts. *J Alzheimers Dis*, 20 Suppl 2, S413-426.  
525 doi:10.3233/JAD-2010-100465
- 526 Alassaf, M., Daykin, E. C., Mathiaparanam, J., & Wolman, M. A. (2019). Pregnancy-associated  
527 plasma protein-aa supports hair cell survival by regulating mitochondrial function. *Elife*,  
528 8. doi:10.7554/eLife.47061
- 529 Alharazneh, A., Luk, L., Huth, M., Monfared, A., Steyger, P. S., Cheng, A. G., & Ricci, A. J.  
530 (2011). Functional hair cell mechanotransducer channels are required for  
531 aminoglycoside ototoxicity. *PLoS One*, 6(7), e22347. doi:10.1371/journal.pone.0022347
- 532 Antonenkov, V. D., Isomursu, A., Mennerich, D., Vapola, M. H., Weiher, H., Kietzmann, T., &  
533 Hiltunen, J. K. (2015). The Human Mitochondrial DNA Depletion Syndrome Gene  
534 MPV17 Encodes a Non-selective Channel That Modulates Membrane Potential. *The*  
535 *Journal of biological chemistry*, 290(22), 13840-13861. doi:10.1074/jbc.M114.608083
- 536 Baumann, M., Schreiber, H., Schlotter-Weigel, B., Loscher, W. N., Stucka, R., Karall, D., . . .  
537 Senderek, J. (2019). MPV17 mutations in juvenile- and adult-onset axonal sensorimotor  
538 polyneuropathy. *Clin Genet*, 95(1), 182-186. doi:10.1111/cge.13462
- 539 Binder, C. J., Weiher, H., Exner, M., & Kerjaschki, D. (1999). Glomerular overproduction of  
540 oxygen radicals in Mpv17 gene-inactivated mice causes podocyte foot process flattening  
541 and proteinuria: A model of steroid-resistant nephrosis sensitive to radical scavenger  
542 therapy. *Am J Pathol*, 154(4), 1067-1075. doi:10.1016/S0002-9440(10)65359-X
- 543 Bolte, S., & Cordelieres, F. P. (2006). A guided tour into subcellular colocalization analysis in  
544 light microscopy. *J Microsc*, 224(Pt 3), 213-232. doi:10.1111/j.1365-2818.2006.01706.x
- 545 Bottger, E. C., & Schacht, J. (2013). The mitochondrion: a perpetrator of acquired hearing loss.  
546 *Hear Res*, 303, 12-19. doi:10.1016/j.heares.2013.01.006
- 547 Brookes, P. S., Yoon, Y., Robotham, J. L., Anders, M. W., & Sheu, S. S. (2004). Calcium, ATP,  
548 and ROS: a mitochondrial love-hate triangle. *Am J Physiol Cell Physiol*, 287(4), C817-  
549 833. doi:10.1152/ajpcell.00139.2004
- 550 Collins, Y., Chouchani, E. T., James, A. M., Menger, K. E., Cocheme, H. M., & Murphy, M. P.  
551 (2012). Mitochondrial redox signalling at a glance. *J Cell Sci*, 125(Pt 4), 801-806.  
552 doi:10.1242/jcs.098475
- 553 D'Agati, G., Beltre, R., Sessa, A., Burger, A., Zhou, Y., Mosimann, C., & White, R. M. (2017). A  
554 defect in the mitochondrial protein Mpv17 underlies the transparent casper zebrafish.  
555 *Dev Biol*, 430(1), 11-17. doi:10.1016/j.ydbio.2017.07.017
- 556 Dijkgraaf, S. (1963). The functioning and significance of the lateral-line organs. *Biol Rev Camb*  
557 *Philos Soc*, 38, 51-105. doi:10.1111/j.1469-185x.1963.tb00654.x
- 558 El-Hattab, A. W., Wang, J., Dai, H., Almannai, M., Staufner, C., Alfadhel, M., . . . Wong, L. C.  
559 (2018). MPV17-related mitochondrial DNA maintenance defect: New cases and review  
560 of clinical, biochemical, and molecular aspects. *Hum Mutat*, 39(4), 461-470.  
561 doi:10.1002/humu.23387
- 562 Esterberg, R., Hailey, D. W., Rubel, E. W., & Raible, D. W. (2014). ER-mitochondrial calcium  
563 flow underlies vulnerability of mechanosensory hair cells to damage. *J Neurosci*, 34(29),  
564 9703-9719. doi:10.1523/JNEUROSCI.0281-14.2014
- 565 Esterberg, R., Linbo, T., Pickett, S. B., Wu, P., Ou, H. C., Rubel, E. W., & Raible, D. W. (2016).  
566 Mitochondrial calcium uptake underlies ROS generation during aminoglycoside-induced  
567 hair cell death. *J Clin Invest*, 126(9), 3556-3566. doi:10.1172/JCI84939
- 568 Glasauer, S. M., & Neuhauss, S. C. (2014). Whole-genome duplication in teleost fishes and its  
569 evolutionary consequences. *Mol Genet Genomics*, 289(6), 1045-1060.  
570 doi:10.1007/s00438-014-0889-2

## Mpv17's role in hair-cell homeostasis and damage

- 571 Gorlach, A., Bertram, K., Hudecova, S., & Krizanova, O. (2015). Calcium and ROS: A mutual  
572 interplay. *Redox Biol*, 6, 260-271. doi:10.1016/j.redox.2015.08.010
- 573 Hailey, D. W., Esterberg, R., Linbo, T. H., Rubel, E. W., & Raible, D. W. (2017). Fluorescent  
574 aminoglycosides reveal intracellular trafficking routes in mechanosensory hair cells. *J*  
575 *Clin Invest*, 127(2), 472-486. doi:10.1172/JCI85052
- 576 Holmgren, M., Ravicz, M. E., Hancock, K. E., Strelkova, O., Indzhukulian, A. A., Warchol, M. E.,  
577 & Sheets, L. (2021). Mechanical overstimulation causes acute injury and synapse loss  
578 followed by fast recovery in lateral-line neuromasts of larval zebrafish. *bioRxiv*,  
579 2020.2007.2015.205492. doi:10.1101/2020.07.15.205492
- 580 Holmgren, M., & Sheets, L. (2020). Using the Zebrafish Lateral Line to Understand the Roles of  
581 Mitochondria in Sensorineural Hearing Loss. *Front Cell Dev Biol*, 8, 628712.  
582 doi:10.3389/fcell.2020.628712
- 583 Hsu, C. H., Kwon, H., Perng, C. L., Bai, R. K., Dai, P., & Wong, L. J. (2005). Hearing loss in  
584 mitochondrial disorders. *Ann N Y Acad Sci*, 1042, 36-47. doi:10.1196/annals.1338.004
- 585 Ivannikov, M. V., & Macleod, G. T. (2013). Mitochondrial free Ca(2)(+) levels and their effects on  
586 energy metabolism in Drosophila motor nerve terminals. *Biophys J*, 104(11), 2353-2361.  
587 doi:10.1016/j.bpj.2013.03.064
- 588 Jacinto, S., Guerreiro, P., de Oliveira, R. M., Cunha-Oliveira, T., Santos, M. J., Grazina, M., . . .  
589 Outeiro, T. F. (2021). MPV17 Mutations Are Associated With a Quiescent Energetic  
590 Metabolic Profile. *Frontiers in cellular neuroscience*, 15, 641264.  
591 doi:10.3389/fncel.2021.641264
- 592 Kann, O., & Kovacs, R. (2007). Mitochondria and neuronal activity. *Am J Physiol Cell Physiol*,  
593 292(2), C641-657. doi:10.1152/ajpcell.00222.2006
- 594 Kim, K. X., Payne, S., Yang-Hood, A., Li, S. Z., Davis, B., Carlquist, J., . . . Rutherford, M. A.  
595 (2019). Vesicular Glutamatergic Transmission in Noise-Induced Loss and Repair of  
596 Cochlear Ribbon Synapses. *J Neurosci*, 39(23), 4434-4447.  
597 doi:10.1523/JNEUROSCI.2228-18.2019
- 598 Krauss, J., Astrinidis, P., Astrinides, P., Frohnhof, H. G., Walderich, B., & Nusslein-Volhard, C.  
599 (2013). transparent, a gene affecting stripe formation in Zebrafish, encodes the  
600 mitochondrial protein Mpv17 that is required for iridophore survival. *Biol Open*, 2(7), 703-  
601 710. doi:10.1242/bio.20135132
- 602 Kujawa, S. G., & Liberman, M. C. (2009). Adding insult to injury: cochlear nerve degeneration  
603 after "temporary" noise-induced hearing loss. *J Neurosci*, 29(45), 14077-14085.  
604 doi:10.1523/JNEUROSCI.2845-09.2009
- 605 Martorano, L., Peron, M., Laquatra, C., Lidron, E., Facchinello, N., Meneghetti, G., . . .  
606 Argenton, F. (2019). The zebrafish orthologue of the human hepatocerebral disease  
607 gene MPV17 plays pleiotropic roles in mitochondria. *Dis Model Mech*, 12(3).  
608 doi:10.1242/dmm.037226
- 609 Matlib, M. A., Zhou, Z., Knight, S., Ahmed, S., Choi, K. M., Krause-Bauer, J., . . . Bers, D. M.  
610 (1998). Oxygen-bridged dinuclear ruthenium amine complex specifically inhibits Ca<sup>2+</sup>  
611 uptake into mitochondria in vitro and in situ in single cardiac myocytes. *J Biol Chem*,  
612 273(17), 10223-10231. doi:10.1074/jbc.273.17.10223
- 613 Meyer zum Gottesberge, A. M., Felix, H., Reuter, A., & Weiher, H. (2001). Ultrastructural and  
614 physiological defects in the cochlea of the Mpv17 mouse strain. A comparison between  
615 young and old adult animals. *Hear Res*, 156(1-2), 69-80. doi:10.1016/s0378-  
616 5955(01)00268-4
- 617 Meyer zum Gottesberge, A. M., Massing, T., & Hansen, S. (2012). Missing mitochondrial Mpv17  
618 gene function induces tissue-specific cell-death pathway in the degenerating inner ear.  
619 *Cell Tissue Res*, 347(2), 343-356. doi:10.1007/s00441-012-1326-7

## Mpv17's role in hair-cell homeostasis and damage

- 620 Mot, A. I., Liddell, J. R., White, A. R., & Crouch, P. J. (2016). Circumventing the Crabtree Effect:  
621 A method to induce lactate consumption and increase oxidative phosphorylation in cell  
622 culture. *Int J Biochem Cell Biol*, 79, 128-138. doi:10.1016/j.biocel.2016.08.029
- 623 Muller, M., Smolders, J. W., Meyer zum Gottesberge, A. M., Reuter, A., Zwacka, R. M., Weiher,  
624 H., & Klinke, R. (1997). Loss of auditory function in transgenic Mpv17-deficient mice.  
625 *Hear Res*, 114(1-2), 259-263. doi:10.1016/s0378-5955(97)00175-5
- 626 Nicolson, T. (2017). The genetics of hair-cell function in zebrafish. *J Neurogenet*, 31(3), 102-  
627 112. doi:10.1080/01677063.2017.1342246
- 628 Nüsslein-Volhard, C., & Dahm, R. (2002). *Zebrafish : a practical approach* (1st ed.). Oxford:  
629 Oxford University Press.
- 630 Obholzer, N., Wolfson, S., Trapani, J. G., Mo, W., Nechiporuk, A., Busch-Nentwich, E., . . .  
631 Nicolson, T. (2008). Vesicular glutamate transporter 3 is required for synaptic  
632 transmission in zebrafish hair cells. *J Neurosci*, 28(9), 2110-2118.  
633 doi:10.1523/JNEUROSCI.5230-07.2008
- 634 Olive, R., Wolf, S., Dubreuil, A., Bormuth, V., Debregeas, G., & Candelier, R. (2016). Rheotaxis  
635 of Larval Zebrafish: Behavioral Study of a Multi-Sensory Process. *Front Syst Neurosci*,  
636 10, 14. doi:10.3389/fnsys.2016.00014
- 637 Olszewski, J., Haehnel, M., Taguchi, M., & Liao, J. C. (2012). Zebrafish larvae exhibit rheotaxis  
638 and can escape a continuous suction source using their lateral line. *PLoS One*, 7(5),  
639 e36661. doi:10.1371/journal.pone.0036661
- 640 Owens, K. N., Coffin, A. B., Hong, L. S., Bennett, K. O., Rubel, E. W., & Raible, D. W. (2009).  
641 Response of mechanosensory hair cells of the zebrafish lateral line to aminoglycosides  
642 reveals distinct cell death pathways. *Hear Res*, 253(1-2), 32-41.  
643 doi:10.1016/j.heares.2009.03.001
- 644 Pendergrass, W., Wolf, N., & Poot, M. (2004). Efficacy of MitoTracker Green and CMXRosamine  
645 to measure changes in mitochondrial membrane potentials in living cells and tissues.  
646 *Cytometry A*, 61(2), 162-169. doi:10.1002/cyto.a.20033
- 647 Puschner, B., & Schacht, J. (1997). Energy metabolism in cochlear outer hair cells in vitro. *Hear*  
648 *Res*, 114(1-2), 102-106. doi:10.1016/s0378-5955(97)00163-9
- 649 Schneider, C. A., Rasband, W. S., & Eliceiri, K. W. (2012). NIH Image to ImageJ: 25 years of  
650 image analysis. *Nat Methods*, 9(7), 671-675. doi:10.1038/nmeth.2089
- 651 Sheets, L., Trapani, J. G., Mo, W., Obholzer, N., & Nicolson, T. (2011). Ribeye is required for  
652 presynaptic Ca(V)1.3a channel localization and afferent innervation of sensory hair cells.  
653 *Development*, 138(7), 1309-1319. doi:10.1242/dev.059451
- 654 Song, Q., Shen, P., Li, X., Shi, L., Liu, L., Wang, J., . . . Wang, J. (2016). Coding deficits in  
655 hidden hearing loss induced by noise: the nature and impacts. *Sci Rep*, 6, 25200.  
656 doi:10.1038/srep25200
- 657 Spinazzola, A., Santer, R., Akman, O. H., Tsiakas, K., Schaefer, H., Ding, X., . . . Zeviani, M.  
658 (2008). Hepatocerebral form of mitochondrial DNA depletion syndrome: novel MPV17  
659 mutations. *Arch Neurol*, 65(8), 1108-1113. doi:10.1001/archneur.65.8.1108
- 660 Stewart, W. J., Cardenas, G. S., & McHenry, M. J. (2013). Zebrafish larvae evade predators by  
661 sensing water flow. *J Exp Biol*, 216(Pt 3), 388-398. doi:10.1242/jeb.072751
- 662 Suli, A., Watson, G. M., Rubel, E. W., & Raible, D. W. (2012). Rheotaxis in larval zebrafish is  
663 mediated by lateral line mechanosensory hair cells. *PLoS One*, 7(2), e29727.  
664 doi:10.1371/journal.pone.0029727
- 665 Thevenaz, P., Ruttimann, U. E., & Unser, M. (1998). A pyramid approach to subpixel  
666 registration based on intensity. *IEEE Trans Image Process*, 7(1), 27-41.  
667 doi:10.1109/83.650848
- 668 Thisse, B., Thisse, C. (2004). *Fast Release Clones: A High Throughput Expression Analysis*.  
669 ZFIN Direct Data Submission. Retrieved from <http://zfin.org>

## Mpv17's role in hair-cell homeostasis and damage

- 670 Toro, C., Trapani, J. G., Pacentine, I., Maeda, R., Sheets, L., Mo, W., & Nicolson, T. (2015).  
671 Dopamine Modulates the Activity of Sensory Hair Cells. *The Journal of neuroscience :  
672 the official journal of the Society for Neuroscience*, 35(50), 16494-16503.  
673 doi:10.1523/JNEUROSCI.1691-15.2015
- 674 Wang, X., Zhu, Y., Long, H., Pan, S., Xiong, H., Fang, Q., . . . Sha, S. H. (2018). Mitochondrial  
675 Calcium Transporters Mediate Sensitivity to Noise-Induced Losses of Hair Cells and  
676 Cochlear Synapses. *Front Mol Neurosci*, 11, 469. doi:10.3389/fnmol.2018.00469
- 677 White, R. M., Sessa, A., Burke, C., Bowman, T., LeBlanc, J., Ceol, C., . . . Zon, L. I. (2008).  
678 Transparent adult zebrafish as a tool for in vivo transplantation analysis. *Cell Stem Cell*,  
679 2(2), 183-189. doi:10.1016/j.stem.2007.11.002
- 680 Wong, H. C., Zhang, Q., Beirl, A. J., Petralia, R. S., Wang, Y. X., & Kindt, K. (2019). Synaptic  
681 mitochondria regulate hair-cell synapse size and function. *Elife*, 8.  
682 doi:10.7554/eLife.48914
- 683 Zenisek, D., & Matthews, G. (2000). The role of mitochondria in presynaptic calcium handling at  
684 a ribbon synapse. *Neuron*, 25(1), 229-237. doi:10.1016/s0896-6273(00)80885-5
- 685 Zorov, D. B., Juhaszova, M., & Sollott, S. J. (2014). Mitochondrial reactive oxygen species  
686 (ROS) and ROS-induced ROS release. *Physiol Rev*, 94(3), 909-950.  
687 doi:10.1152/physrev.00026.2013

688

689



## Mpv17's role in hair-cell homeostasis and damage

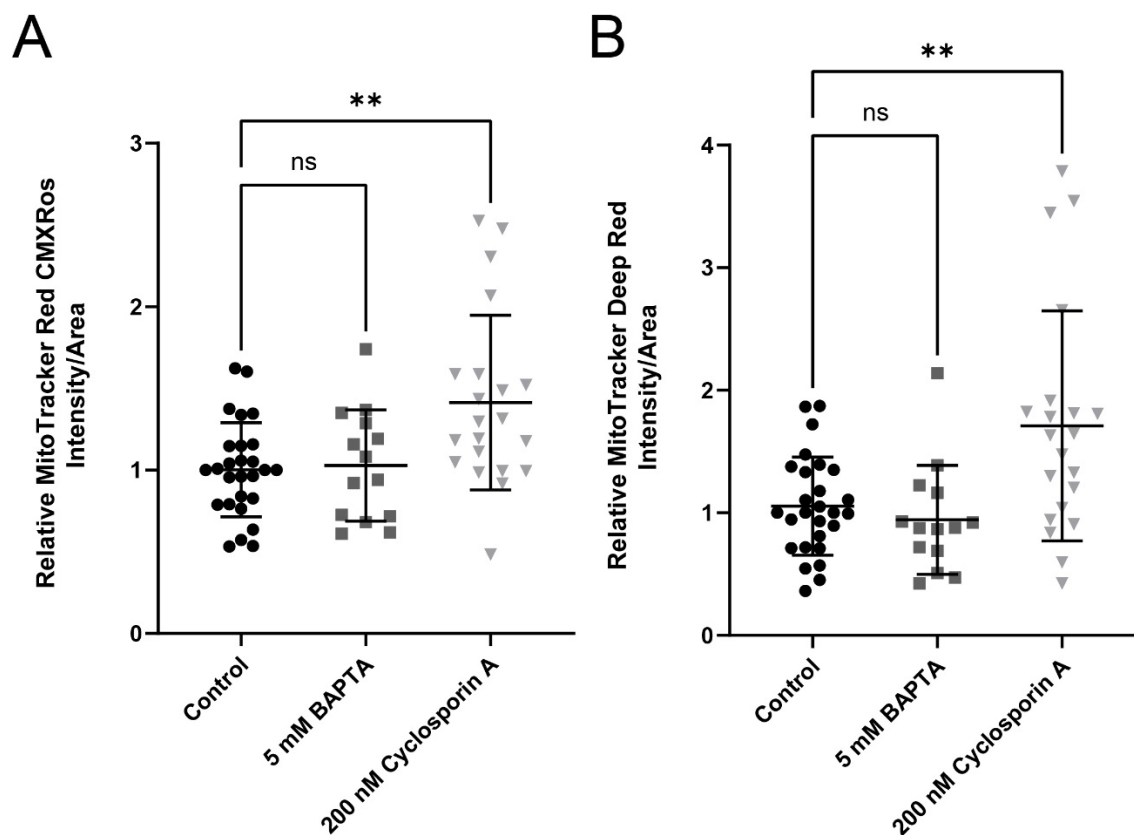

690

### Supplemental Figure 1. Validation of MitoTracker probes

Quantification of MitoTracker Red CMXRos (A) and MitoTracker Deep Red (B) fluorescence in WT neuromasts exposed to 200 nM cyclosporin A (to increase mitochondrial  $\Delta\psi_m$ ) or 5 mM BAPTA (to disrupt tip-links). Cyclosporin A treatment resulted in increased dye accumulation (\*\*P=0.0022 MitoTracker Red CMXRos; \*\*P=0.0025 MitoTracker Deep Red). BAPTA treatment did not significantly affect fluorescence, indicating hair-cell mechanotransduction is not required for uptake of the dyes into hair cells.

691
